# Supplementary material for: Analytical characterization of a method for mercury determination in food using cold vapour capacitively coupled plasma microtorch optical emission spectrometry – compliance with European legislation requirements
Source: Royal Society of Chemistry journal article supplement (doi:10.1039/c4ay02161d), 2014-12-09
Supplement: c4ay02161d1.pdf [file c4ay02161d1.pdf]

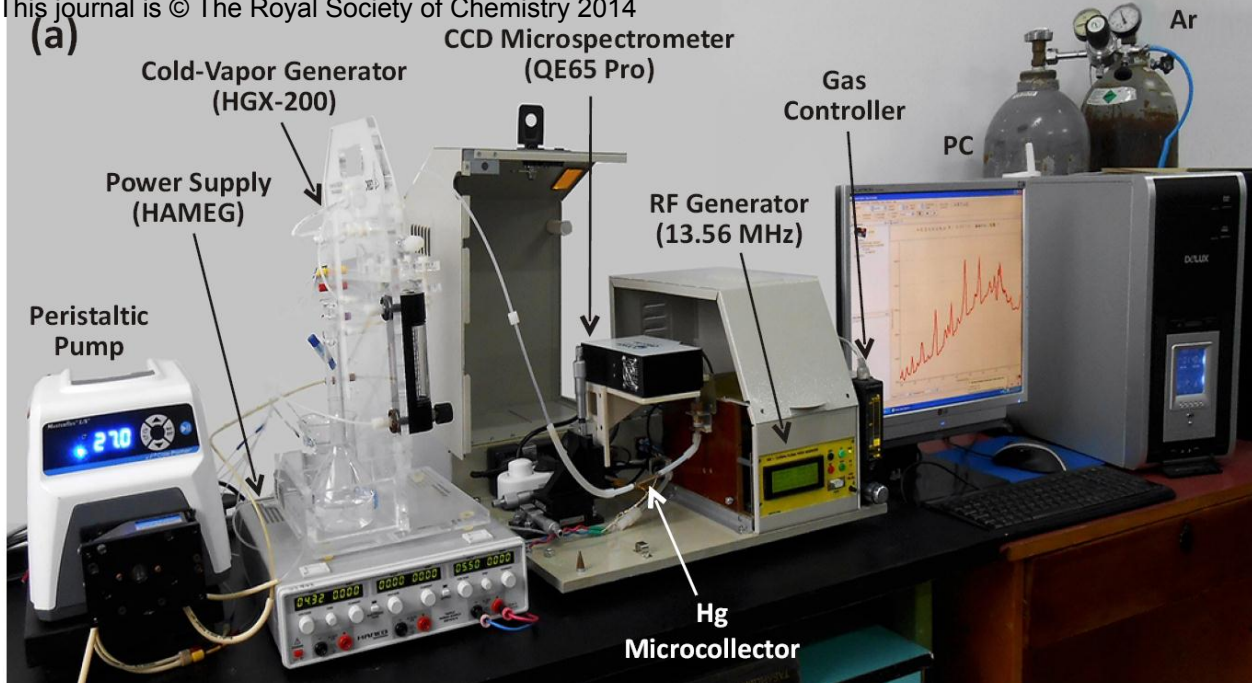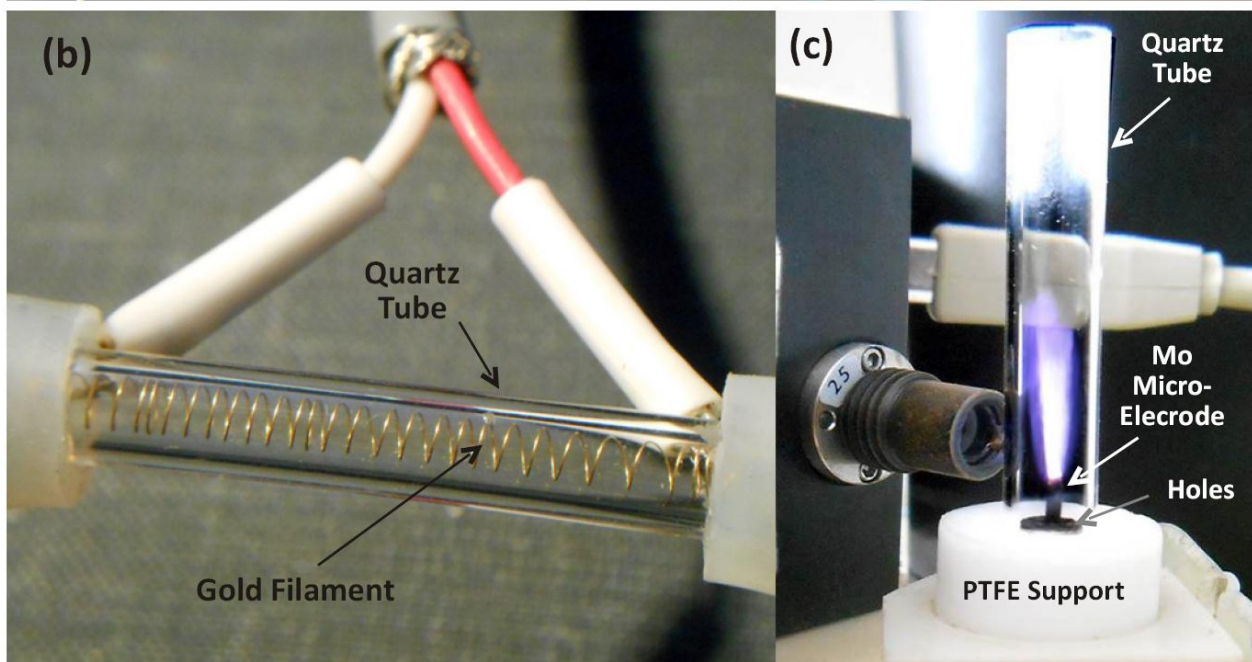

a) Components of new CV- $\mu$ CCP analytical experimental system

b) Hg microcollector with gold filament

c) Capacitively coupled plasma microtorch

#### Experimental conditions:

*Plasma operating power:* 20 W; 13.56 MHz; 200 mL min<sup>-1</sup> Ar flow rate; 1 mm observation height above tip microelectrode.

*CV generation and preconcentration:* reducing agent: 20 (w/v) % SnCl<sub>2</sub> solution stabilized in 15 % (v/v) HCl (1.0 mL min<sup>-1</sup>); sample stabilized in 5 % (v/v) HCl (3.5 mL min<sup>-1</sup>); preconcentration from 25 mL sample solution.

*Microcollector:* gold filament, 100  $\mu$ m diameter, 23 coils (43 cm length). Heating program: 5 s, 5 V and 1.5 A.

*QE65 Microspectrometer:* high speed acquisition; eleven 3-D emission episodic spectra; 8 s acquisition time/episode.
